# Supplementary material for: Effect of raw and purified carbon nanotubes and iron oxide nanoparticles on the growth of wheatgrass prepared from the cotyledons of common wheat (triticum aestivum)
Source: Royal Society of Chemistry journal article supplement (doi:10.1039/c7en00680b), 2017-11-09
Supplement: c7en00680b1.pdf [file c7en00680b1.pdf]

## Effect of raw and purified carbon nanotubes and iron oxide nanoparticles on the growth of wheatgrass prepared from the cotyledons of common wheat (*triticum aestivum*)†

Seung Mook Lee,<sup>a</sup> Pavan M. V. Raja,<sup>a</sup> Gibran L. Esquenazi,<sup>a</sup> and Andrew R. Barron<sup>a,b,c\*</sup>

<sup>a</sup> Department of Chemistry, Rice University, Houston, Texas 77005, USA.

<sup>b</sup> Energy Safety Research Institute, College of Engineering, Swansea University, Bay Campus, Swansea, SA1 8EN, Wales, UK.

<sup>c</sup> Department of Materials Science and Nanoengineering, Rice University, Houston, Texas 77005, USA.

<sup>d</sup> Centre for NanoHealth, Swansea University, Swansea, SA2 8PQ, Wales, UK.

**Table S1.** EDX analysis of NPs.

| Sample             | No. of replicates | C             | O             | Fe            |
|--------------------|-------------------|---------------|---------------|---------------|
| Raw-SWCNTs         | 5                 | 88.3 (0.52)   | 6.8 (0.59)    | 4.4 (0.63)    |
| Purified-SWCNTs    | 5                 | 77.7 (3.6)    | 9.5 (1.3)     | 1.2 (0.4)     |
| n-FeO <sub>x</sub> | 9                 | 26.48 (10.37) | 36.58 (10.28) | 36.48 (20.36) |

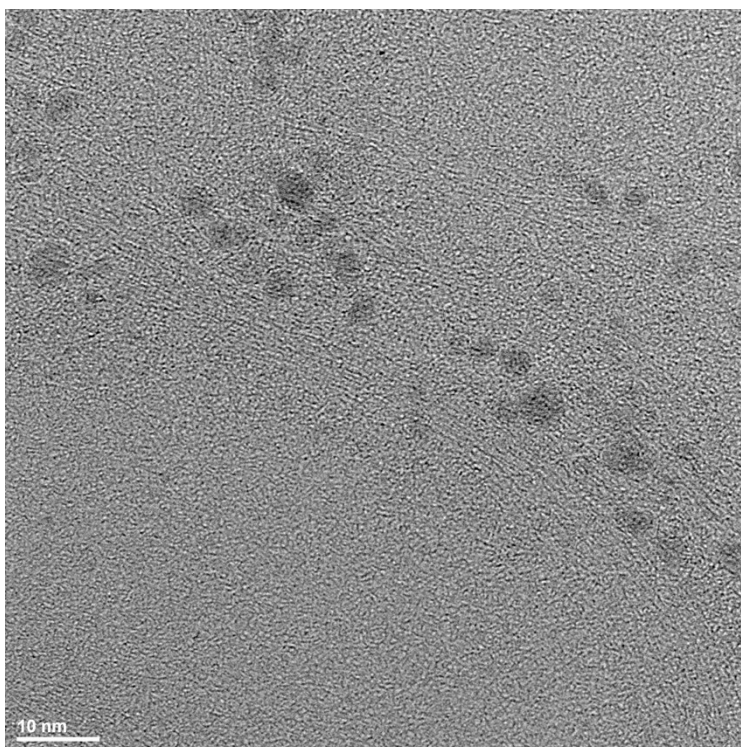

**Fig. S1** High resolution TEM of raw HiPco SWCNTs showing the presence of residual catalyst particles. Scale bar = 10 nm.

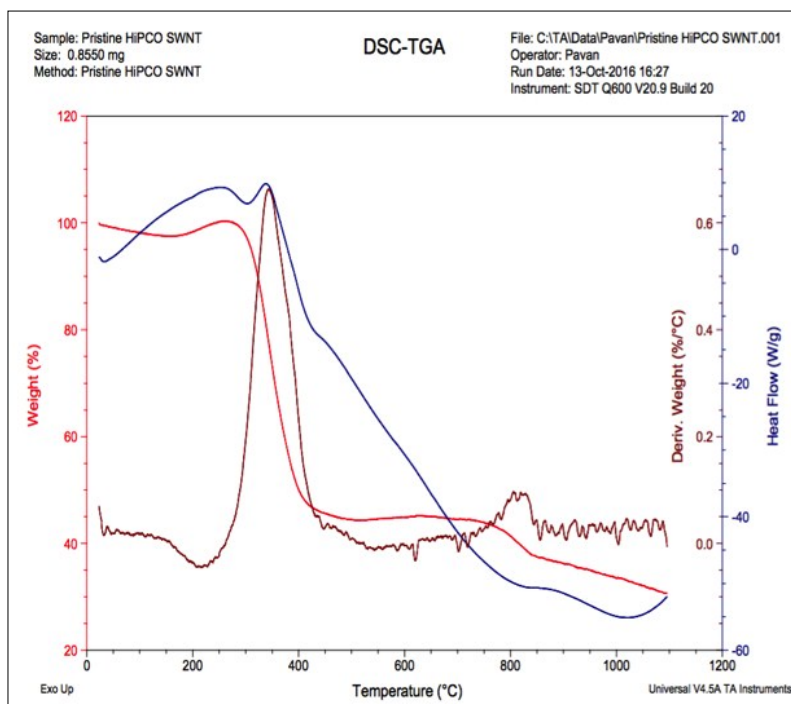

**Fig. S2** TGA/DSC of raw HiPco SWCNTs.

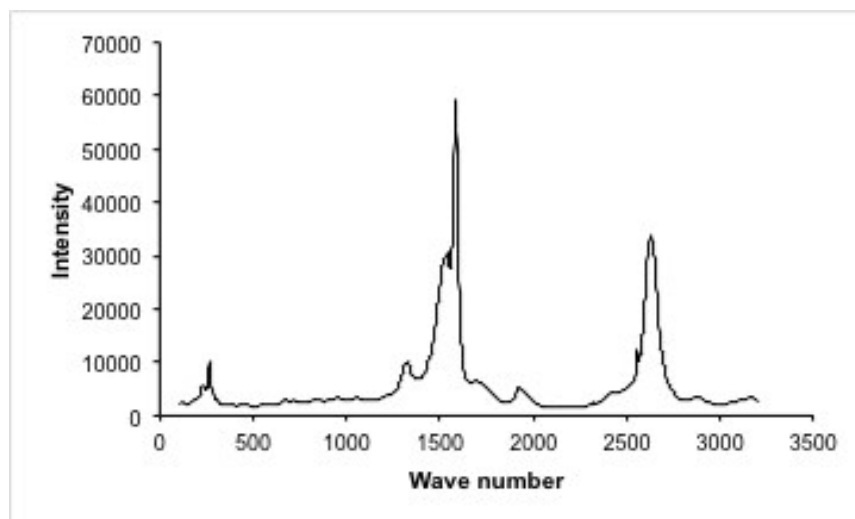

**Fig. S3** Raman of raw HiPco SWCNTs.

---

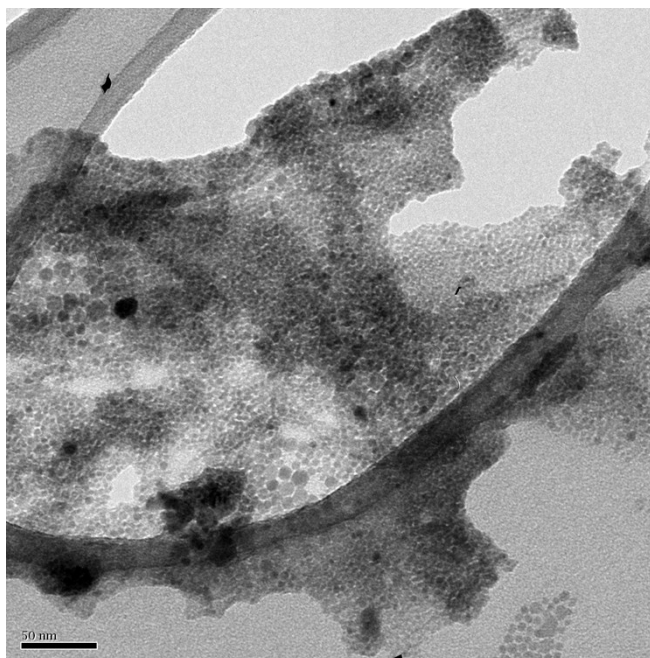

**Fig. S4** High contrast TEM of FeO<sub>x</sub> NPs.

---

Sample: 5% Iron Oxide  
Size: 20.4820 mg

# DSC-TGA

File: C:\...\Iron Oxide\5% H Iron Oxide.001  
Operator: KW  
Run Date: 16-Oct-2015 23:26  
Instrument: SDT Q600 V20.9 Build 20

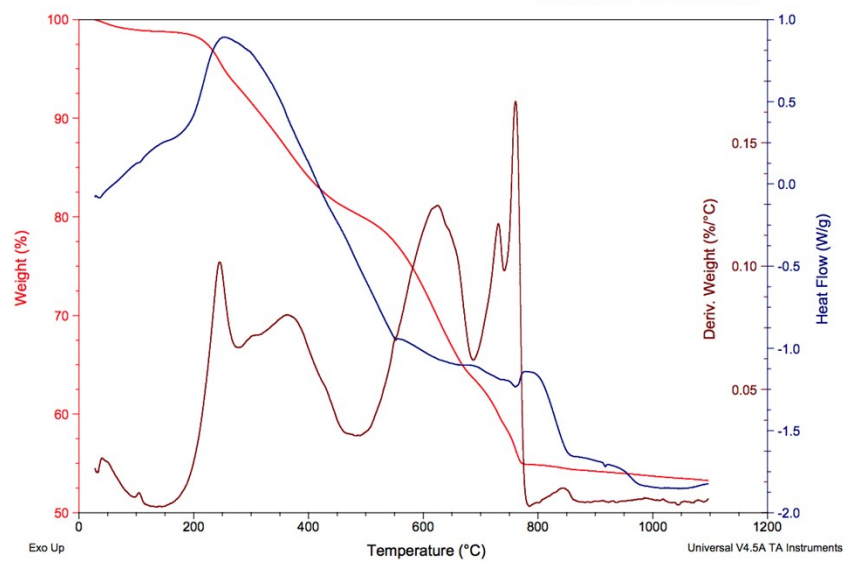

Fig. S5 TGA/DSC of FeO<sub>x</sub> NPs.

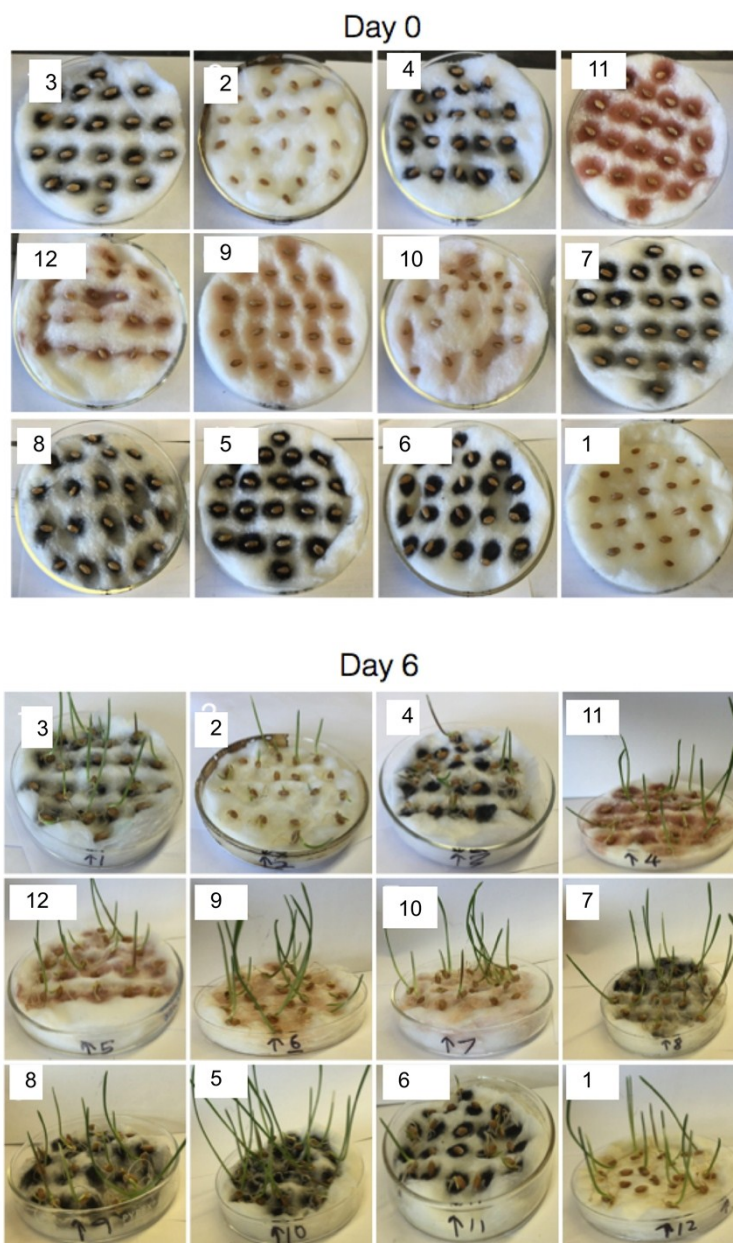

**Fig. S6** Photographic images of wheatgrass seeds (day 0) and subsequent plants after 6 days growth. The sample numbers correspond to those in Table 1.

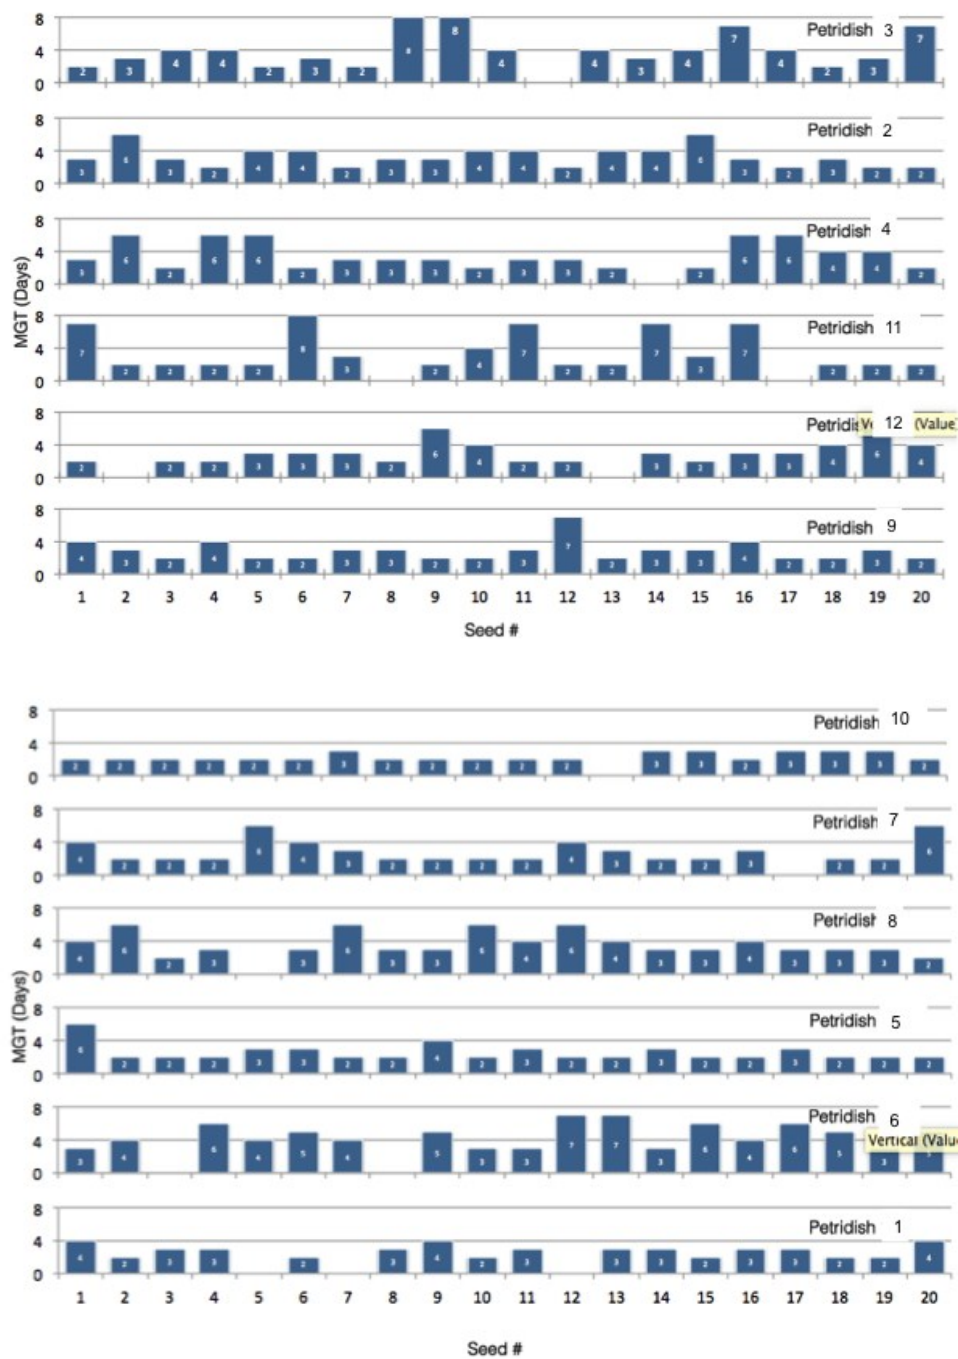

**Fig. S7** Plot of MGT (days) for wheatgrass seeds. The sample numbers correspond to those in Table 1.



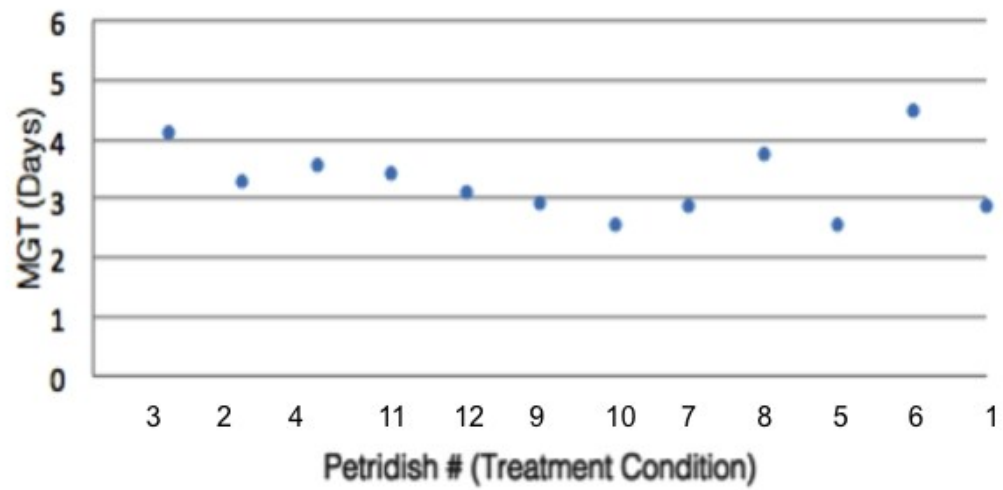

**Fig. S8** Plot of average MGT (days) for wheatgrass seeds. The sample numbers correspond to those in Table 1.

---

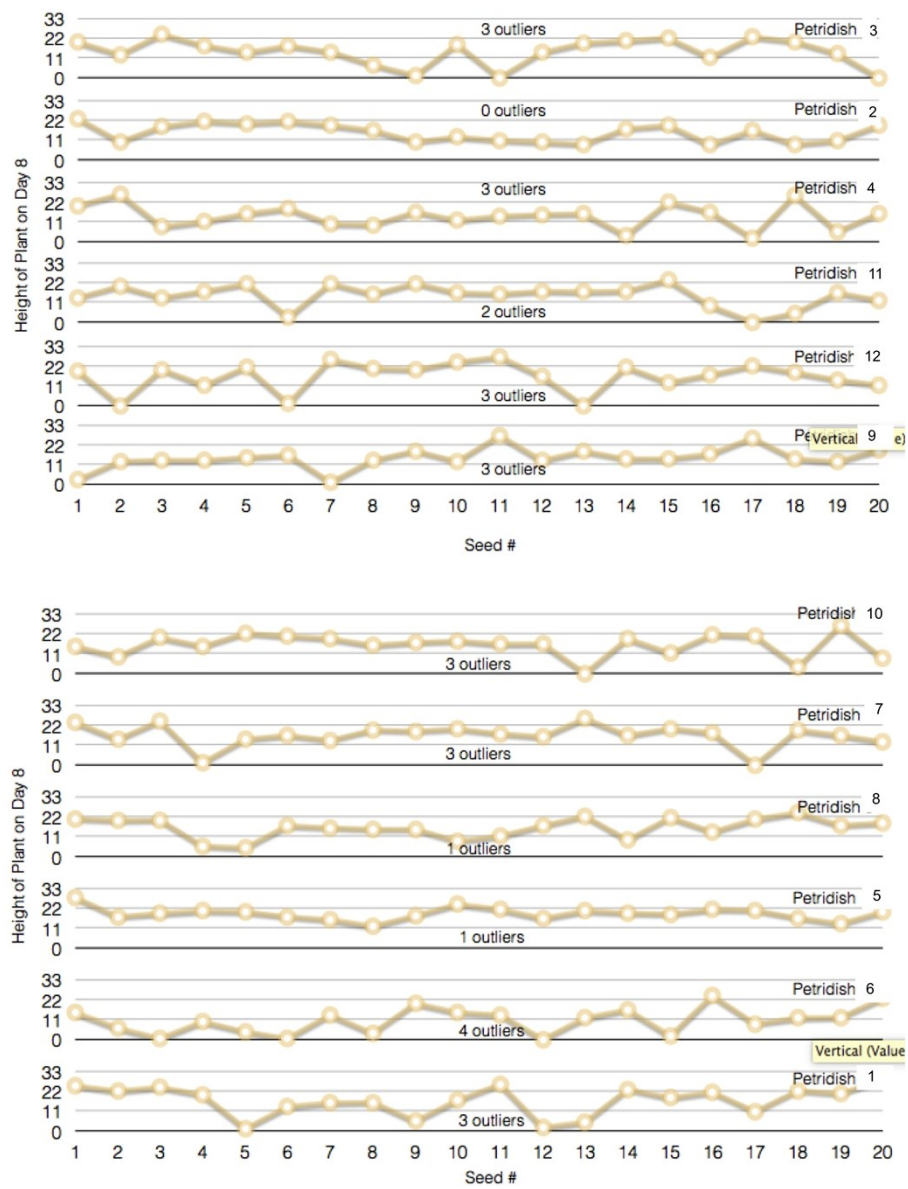

**Fig. S9** Plot of seed height for wheatgrass seeds. The sample numbers correspond to those in Table 1.



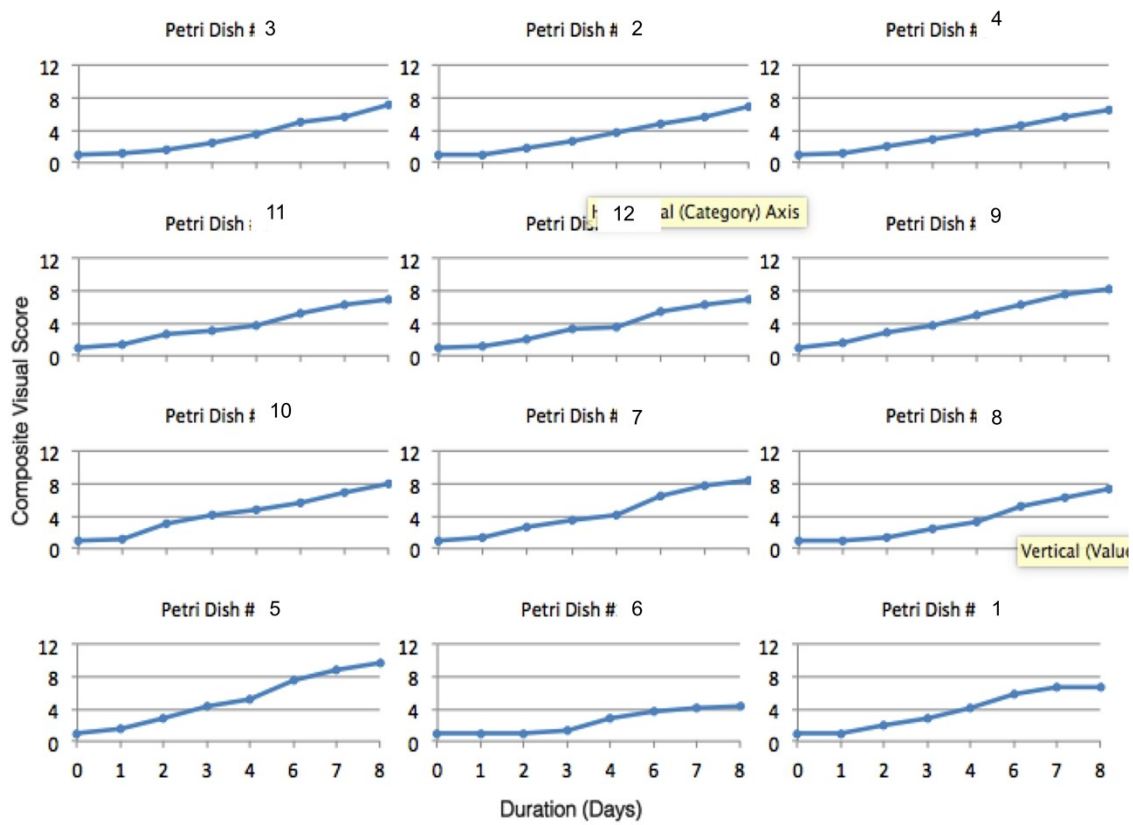

**Fig. S10** Visual growth scores of the seeds/seedlings over time for each treatment condition. The sample numbers correspond to those in Table 1.
